# Supplementary material
Source: MDPI journal article supplement (https://www.mdpi.com/2304-6775/5/4/22)
Supplement: s1 [file s1]

## **Interview Questions**

1. How many open access journals do you publish?
2. What are disciplines your journal(s) in?
3. What is the host organization of your journal(s)?
4. How many articles on average do your journal(s) publish per year?
5. What do you think are the major advantages of running journal(s) in local language?
6. What are the major barriers do you think remain there to publish the journal(s)?
7. Was your journal born OA or converted OA?
8. What motivates you to establish new OA title(s) or transform journal(s) into OA model?
9. Do your journal(s) provide English abstracts of published articles?
10. Have you ever considered the idea of converting your journal(s) to English or bilingual?
  - if yes, what do you perceive as the major barriers for such a conversion?
  - if no, what do you perceive as the major reason not to do that?
11. Do your journal(s) charge publication fees or not?
  - If yes, how much does it cost for the authors? How do you decide the price?
  - If no, what are business models employed by your journal(s)?
